# Supplementary material for: On the Mechanism of Chloroquine Resistance in Plasmodium falciparum
Source: PubMed Central journal article supplement (PMC2988812; doi:10.1371/journal.pone.0014064), 2010-11-19
Supplement: pone.0014064.s002.pdf [file pone.0014064.s002.pdf]

## HHpred results on Pfam and PDB databases

| target  | probability | e-value  | p-value  | score | ss   | % id |
|---------|-------------|----------|----------|-------|------|------|
| PF06027 | 100         | 1.20E-34 | 3.50E-39 | 213.8 | 26.8 | 18   |
| PF08449 | 99.9        | 5.60E-24 | 1.60E-28 | 155.4 | 31.4 | 16   |
| PF04142 | 99.9        | 7.80E-23 | 2.20E-27 | 149.1 | 23.3 | 12   |
| PF03151 | 98.8        | 5.50E-09 | 1.60E-13 | 73.2  | 14.4 | 24   |
| PF05653 | 98.3        | 4.30E-06 | 1.20E-10 | 57.3  | 17.1 | 11   |
| PF00892 | 97.9        | 1.00E-05 | 2.90E-10 | 55.3  | 10.7 | 11   |
| PF08449 | 96.7        | 0.0075   | 2.20E-07 | 39.5  | 14.4 | 9    |
| PF06800 | 96.6        | 0.0037   | 1.10E-07 | 41.2  | 12.5 | 10   |
| PF03151 | 96.6        | 0.0086   | 2.50E-07 | 39.2  | 14.2 | 12   |
| 3b5d_A  | 96          | 0.0085   | 2.40E-07 | 39.2  | 11.1 | 9    |
| 2i68_A  | 95.4        | 0.0037   | 1.10E-07 | 41.2  | 7.1  | 11   |
| PF06027 | 93.8        | 0.14     | 3/E-6    | 32.6  | 15.3 | 8    |
| PF00892 | 92.1        | 0.27     | 7.90E-06 | 31    | 11.5 | 13   |
| PF08627 | 91          | 0.03     | 8.60E-07 | 36.3  | 4.5  | 15   |
| PF06800 | 91          | 0.11     | 3.20E-06 | 33.1  | 7.6  | 12   |
| PF04142 | 90.9        | 0.4      | 1.10E-05 | 30.1  | 11.5 | 14   |
| PF00893 | 90.6        | 0.061    | 1.70E-06 | 34.6  | 5.8  | 9    |
| PF06379 | 90.5        | 0.44     | 1.30E-05 | 29.8  | 12.3 | 11   |
| PF04657 | 87          | 0.9      | 2.60E-05 | 28.1  | 15.4 | 18   |
| PF05653 | 84.8        | 1.1      | 3.20E-05 | 27.6  | 9    | 11   |
| PF10639 | 78          | 0.92     | 2.70E-05 | 28.1  | 6    | 9    |
| 2i68_A  | 71.9        | 4.1      | 0.00012  | 24.5  | 7.9  | 12   |
